# Supplementary material
Source: HighWire-hosted journal article supplement (https://bmjopen.bmj.com/content/12/1/e049955)
Supplement: inline-supplementary-material-1 [file inline-supplementary-material-1.pdf]

NWK\_AlphaDBS\_FIM\_2019

Usability Questionnaire, version 1.0 dated 23 June 2020

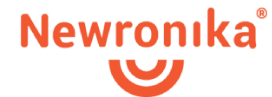

## USABILITY QUESTIONNAIRE

Please, indicate your level of satisfaction:

|                                                                                                                                                  |    |                       |                       |                       |    |
|--------------------------------------------------------------------------------------------------------------------------------------------------|-------------------------------------------------------------------------------------|-----------------------|-----------------------|-----------------------|---------------------------------------------------------------------------------------|
| Functions                                                                                                                                        | 1                                                                                   | 2                     | 3                     | 4                     | 5                                                                                     |
| Do you find it easy to connect the 2 parts of the Patient Programmer?                                                                            | <input type="radio"/>                                                               | <input type="radio"/> | <input type="radio"/> | <input type="radio"/> | <input type="radio"/>                                                                 |
| Do you find it is easy to turn on the patient remote control (both parts)?                                                                       | <input type="radio"/>                                                               | <input type="radio"/> | <input type="radio"/> | <input type="radio"/> | <input type="radio"/>                                                                 |
| Do you understand clearly when the neurostimulator is communicating with the patient remote control?                                             | <input type="radio"/>                                                               | <input type="radio"/> | <input type="radio"/> | <input type="radio"/> | <input type="radio"/>                                                                 |
| Do you understand clearly the battery level of the implanted neurostimulator?                                                                    | <input type="radio"/>                                                               | <input type="radio"/> | <input type="radio"/> | <input type="radio"/> | <input type="radio"/>                                                                 |
| <b>Considerations about screens and alarms</b>                                                                                                   |  |                       |                       |                       |  |
| Do you hear the alarms?                                                                                                                          | <input type="radio"/>                                                               | <input type="radio"/> | <input type="radio"/> | <input type="radio"/> | <input type="radio"/>                                                                 |
| The information provided in the display of the patient programmer are clear and exhaustive?                                                      | <input type="radio"/>                                                               | <input type="radio"/> | <input type="radio"/> | <input type="radio"/> | <input type="radio"/>                                                                 |
| Is it clear what is shown on the display when you connect the 2 parts of the patient remote control?                                             | <input type="radio"/>                                                               | <input type="radio"/> | <input type="radio"/> | <input type="radio"/> | <input type="radio"/>                                                                 |
| Do you understand if the charging procedure is correctly ongoing?                                                                                | <input type="radio"/>                                                               | <input type="radio"/> | <input type="radio"/> | <input type="radio"/> | <input type="radio"/>                                                                 |
| Do you understand when the charging process is interrupted due to misalignment of the patient remote control with the implanted neurostimulator? | <input type="radio"/>                                                               | <input type="radio"/> | <input type="radio"/> | <input type="radio"/> | <input type="radio"/>                                                                 |
| Do you understand how to check the battery level of your neurostimulator?                                                                        | <input type="radio"/>                                                               | <input type="radio"/> | <input type="radio"/> | <input type="radio"/> | <input type="radio"/>                                                                 |

Date: \_\_/\_\_/\_\_\_\_

NWK\_AlphaDBS\_FIM\_2019

Usability Questionnaire, version 1.0 dated 23 June 2020

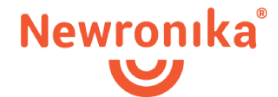

| <b>Consideration about the patient remote control and its accessories</b> |  |                       |                       |                       |  |
|---------------------------------------------------------------------------|-----------------------------------------------------------------------------------|-----------------------|-----------------------|-----------------------|-------------------------------------------------------------------------------------|
| Device dimension                                                          | <input type="radio"/>                                                             | <input type="radio"/> | <input type="radio"/> | <input type="radio"/> | <input type="radio"/>                                                               |
| Buttons dimension                                                         | <input type="radio"/>                                                             | <input type="radio"/> | <input type="radio"/> | <input type="radio"/> | <input type="radio"/>                                                               |
| Patient remote control portability                                        | <input type="radio"/>                                                             | <input type="radio"/> | <input type="radio"/> | <input type="radio"/> | <input type="radio"/>                                                               |
| AlphaDBS T-shirt                                                          | <input type="radio"/>                                                             | <input type="radio"/> | <input type="radio"/> | <input type="radio"/> | <input type="radio"/>                                                               |
| AlphaDBS Collar                                                           | <input type="radio"/>                                                             | <input type="radio"/> | <input type="radio"/> | <input type="radio"/> | <input type="radio"/>                                                               |
| <b>User Information</b>                                                   |  |                       |                       |                       |  |
| AlphaDBSpat Patient Manual                                                | <input type="radio"/>                                                             | <input type="radio"/> | <input type="radio"/> | <input type="radio"/> | <input type="radio"/>                                                               |

Date: \_\_/\_\_/\_\_\_\_
